# Supplementary material
Source: PubMed Central journal article supplement (PMC5505781)
Supplement: NIHMS858428-supplement-1.pdf [file NIHMS858428-supplement-1.pdf]

**Gupta et al. SUPPLEMENTARY DATA**

**Supplementary Table 1: Reactivation of latent HIV-1 from different J-Lat clones.**

| J-Lat Clone | % Cells Expressing GFP <sup>a</sup> |       | Copies/mL Extracellular HIV RNA ( $\times 10^5$ ) |       |
|-------------|-------------------------------------|-------|---------------------------------------------------|-------|
|             | - PMA                               | + PMA | - PMA                                             | + PMA |
| J-Lat 10.6  | 1.9                                 | 85.7  | 1.03                                              | 92.3  |
| J-Lat 9.2   | 0.0                                 | 10.6  | 0.028                                             | 2.5   |
| J-Lat 8.4   | 0.0                                 | 22.4  | 0.004                                             | 0.18  |

<sup>a</sup> Percentage of cells expressing GFP was determined by flow cytometry before and after stimulation with 100 nM PMA.

<sup>b</sup> Virion associated extracellular HIV-1 RNA was quantified by RT-PCR before and after stimulation with 100 nM PMA.

**Supplementary Table 2: Total HIV-1 DNA in rCD4+ T cells before and after exposure to anti-CD3/CD28 monoclonal antibodies**

| Participant ID                   | Cell number before stimulation ( $\times 10^6$ ) | Cell number after stimulation ( $\times 10^6$ ) | Fold change in cell number | Total HIV-1 DNA before stimulation (copies/ $10^6$ ) | Total HIV-1 DNA after stimulation (copies/ $10^6$ ) | Fold change in total HIV-1 DNA |
|----------------------------------|--------------------------------------------------|-------------------------------------------------|----------------------------|------------------------------------------------------|-----------------------------------------------------|--------------------------------|
| 001                              | 5                                                | 9                                               | 1.8                        | 4,861.00                                             | 2,393.00                                            | 0.5                            |
| 002                              | 4.5                                              | 9.7                                             | 2.2                        | 949                                                  | 1,012.00                                            | 1.1                            |
| 003                              | 3                                                | 6.3                                             | 2.1                        | 794                                                  | 404                                                 | 0.5                            |
| 004                              | 4                                                | 5.6                                             | 1.4                        | 1,113.00                                             | 852                                                 | 0.8                            |
| 005                              | 8                                                | 14                                              | 1.8                        | NA                                                   | NA                                                  | NA                             |
| 006                              | 6                                                | 9.5                                             | 1.6                        | NA                                                   | NA                                                  | NA                             |
| 007                              | 2                                                | 3.4                                             | 1.7                        | 5,279.00                                             | 6,514.00                                            | 1.2                            |
| 008                              | 3                                                | 5.1                                             | 1.7                        | 894                                                  | 1,123.00                                            | 1.3                            |
| 009                              | 10                                               | 17                                              | 1.7                        | 56.9                                                 | 46.2                                                | 0.8                            |
| 010                              | 9                                                | 10                                              | 1.11                       | 2,508.00                                             | 2,017.00                                            | 0.8                            |
| 011                              | 2                                                | 1.4                                             | 0.7                        | 5,015.00                                             | 2,262.00                                            | 0.5                            |
| 012                              | 1.5                                              | 2.3                                             | 1.5                        | NA                                                   | NA                                                  | NA                             |
| 013                              | NA                                               | NA                                              | NA                         | 1,198.00                                             | 948                                                 | 0.8                            |
| 014                              | NA                                               | NA                                              | NA                         | NA                                                   | NA                                                  | NA                             |
| 015                              | NA                                               | NA                                              | NA                         | NA                                                   | NA                                                  | NA                             |
| <b>Mean <math>\pm</math> STD</b> | 4.8 $\pm$ 2.9                                    | 7.8 $\pm$ 4.7                                   | 1.6 $\pm$ 0.4              | 2266.8 $\pm$ 2015                                    | 1757.1 $\pm$ 1842.2                                 | 0.8 $\pm$ 0.3                  |

**Supplementary Table 3: Amplification of extracellular virion-associated HIV-1 RNA derived from TZM-bl cells co-cultured with rCD4+ T cells from an HIV-1-infected participant.**

| <b>Participant ID</b> | <b>Number of cells cultured/well</b> | <b>Virion-associated HIV-1 RNA (copies/mL) Day 3</b> | <b>Virion-associated HIV-1 RNA (copies/mL) Day 10</b> | <b>B-Gal RLU (10<sup>6</sup>)</b> |
|-----------------------|--------------------------------------|------------------------------------------------------|-------------------------------------------------------|-----------------------------------|
| 016                   | 31,000                               | 20                                                   | 27,340                                                | 2.6<br>(2.4- 2.7)                 |

CD3/CD28 mAb-activated participant rCD4+T cells were added to TZM-bl cells. Following 48 h incubation, activated CD8-depleted PBMC were added and co-cultivation was continued for an additional 10 days. Extracellular virion associated HIV-1 RNA was measured in culture supernatant by RT-PCR.

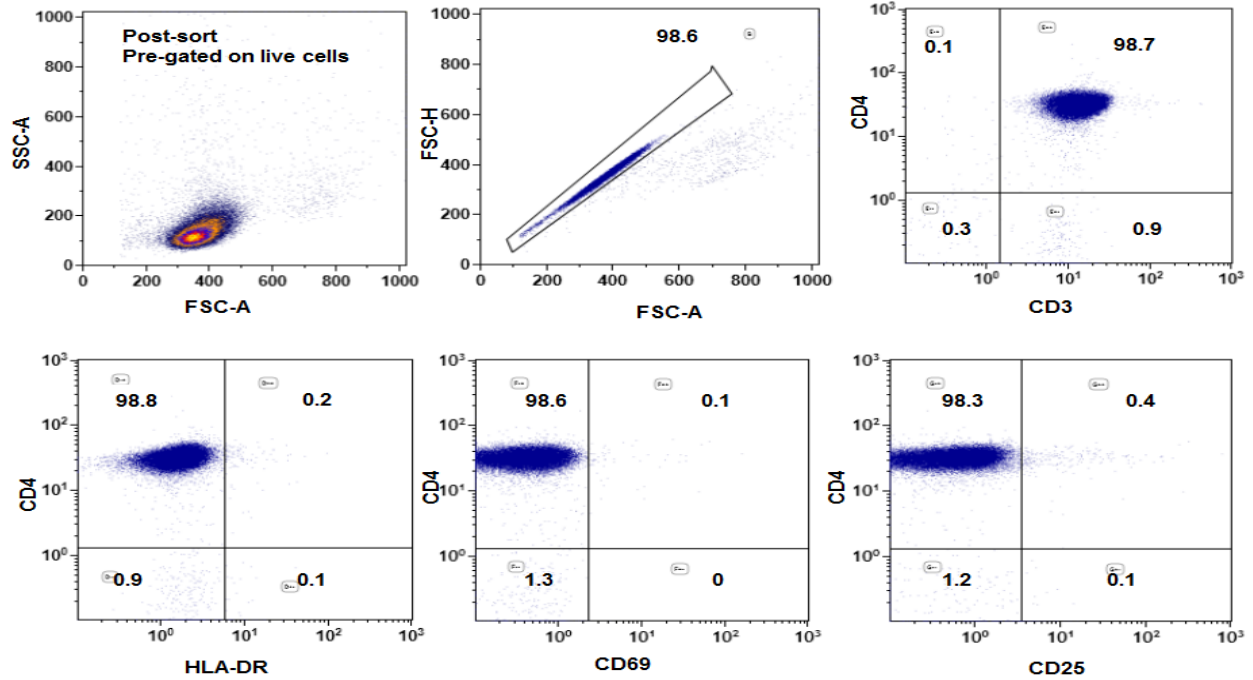

**Supplementary Fig. 1: Flow cytometric analysis of the isolated rCD4<sup>+</sup> T cell population.**

rCD4<sup>+</sup> T cells purity was > 98% (n=16, 98.1 +/- 0.8%).

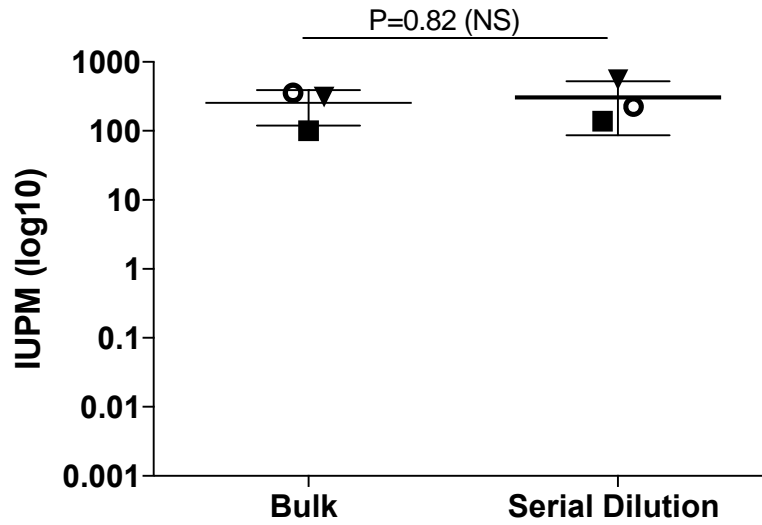

**Supplementary Fig. 2: Comparison of IUPM from bulk stimulated or stimulated after serial dilution of rCD4+ T cells.** Statistical comparison of the IUPM values determined for rCD4+ T cells isolated from HIV-infected individuals in which cells were either exposed to anti-CD3/CD28 in bulk (c.f. Fig. 3a), or following serial dilution. Statistical differences were assessed using a parametric T test.
